# Supplementary material for: Epidemiology of overdose episodes from the period prior to hospitalization for drug poisoning until discharge in Japan: An exploratory descriptive study using a nationwide claims database
Source: PubMed Central journal article supplement (PMC5549249; doi:10.1016/j.je.2016.08.010), 2017-02-24
Supplement: mmc1.pdf [file mmc1.pdf]

**eTable 1.** Complete list of psychotropic medications

| Drug                                                   | Drug             |
|--------------------------------------------------------|------------------|
| Sedatives-hypnotics                                    | Antipsychotics   |
| alprazolam <sup>a</sup>                                | perospirone      |
| amobarbital <sup>b</sup>                               | perphenazine     |
| barbital <sup>b</sup>                                  | pimozide         |
| bromazepam <sup>a</sup>                                | pipamperone      |
| bromovalerylurea <sup>c</sup>                          | prochlorperazine |
| brotizolam <sup>a</sup>                                | propericiazine   |
| chloral <sup>c</sup>                                   | quetiapine       |
| chlordiazepoxide <sup>a</sup>                          | reserpine        |
| chlorpromazine-promethazine-phenobarbital <sup>b</sup> | risperidone      |
| clorazepate dipotassium <sup>a</sup>                   | spiperone        |
| clotiazepam <sup>a</sup>                               | sulpiride        |
| cloxazolam <sup>a</sup>                                | sultopride       |
| diazepam <sup>a</sup>                                  | tiapride         |
| estazolam <sup>a</sup>                                 | timiperone       |
| eszopiclone <sup>a</sup>                               | trifluoperazine  |
| ethyl loflazepate <sup>a</sup>                         | zotepine         |
| etizolam <sup>a</sup>                                  | Antidepressants  |
| fludiazepam <sup>a</sup>                               | amitriptyline    |
| flunitrazepam <sup>a</sup>                             | amoxapine        |
| flurazepam <sup>a</sup>                                | clomipramine     |
| flutazolam <sup>a</sup>                                | dosulepin        |
| flutoprazepam <sup>a</sup>                             | duloxetine       |
| haloxazolam <sup>a</sup>                               | escitalopram     |
| hydroxyzine <sup>c</sup>                               | fluvoxamine      |
| lorazepam <sup>a</sup>                                 | imipramine       |
| lormetazepam <sup>a</sup>                              | lofepramine      |
| medazepam <sup>a</sup>                                 | maprotiline      |
| mexazolam <sup>a</sup>                                 | mianserin        |
| nimetazepam <sup>a</sup>                               | milnacipran      |
| nitrazepam <sup>a</sup>                                | mirtazapine      |
| oxazolam <sup>a</sup>                                  | nortriptyline    |
| pentobarbital calcium <sup>b</sup>                     | paroxetine       |
| phenobarbital <sup>b</sup>                             | sertraline       |
| phenobarbital sodium <sup>b</sup>                      | setiptiline      |
| prazepam <sup>a</sup>                                  | trazodone        |
| quazepam <sup>a</sup>                                  | trimipramine     |
| ramelteon <sup>c</sup>                                 | Mood stabilizers |
| rilmazafone <sup>a</sup>                               | carbamazepine    |
| secobarbital sodium <sup>b</sup>                       | lamotrigine      |
| tandospirone citrate <sup>c</sup>                      | lithium          |
| tofisopam <sup>a</sup>                                 | sodium valproate |
| triazolam <sup>a</sup>                                 | Anticonvulsants  |

**eTable 1.** Complete list of psychotropic medications

| Drug                   | Drug                    |
|------------------------|-------------------------|
| triclofos <sup>c</sup> | acetazolamide           |
| zolpidem <sup>a</sup>  | acetylpheneturide       |
| zopiclone <sup>a</sup> | bemegride               |
| Antipsychotics         | clobazam                |
| aripiprazole           | clonazepam              |
| blonanserin            | diazepam (DZP)          |
| bromperidol            | ethosuximide            |
| carpipramine           | ethotoin                |
| chlorpromazine         | fosphenytoin            |
| clocapramine           | gabapentin              |
| clozapine              | levetiracetam           |
| fluphenazine           | phenytoin               |
| haloperidol            | phenytoin-phenobarbital |
| haloperidol decanoate  | primidone               |
| levomepromazine        | rufinamide              |
| mosapramine            | stiripentol             |
| nemonapride            | sultiame                |
| olanzapine             | topiramate              |
| oxypertine             | trimethadione           |
| paliperidone           | zonisamide              |
| paliperidone palmitate |                         |

<sup>a</sup> Benzodiazepines<sup>b</sup> Barbiturates<sup>c</sup> Other sedative-hypnotics.

**eTable 2. Age- and sex-standardized rate ratios according to prefecture**

| Prefecture | n     | Direct standardization <sup>a</sup> | Indirect standardization <sup>b</sup> (95% credibility interval) |
|------------|-------|-------------------------------------|------------------------------------------------------------------|
| Hokkaido   | 1,175 | 21.4                                | 1.24 (1.17, 1.31)*                                               |
| Aomori     | 168   | 12.1                                | 0.77 (0.67, 0.88)*                                               |
| Iwate      | 258   | 19.8                                | 1.13 (1.01, 1.26)*                                               |
| Miyagi     | 426   | 18.1                                | 1.06 (0.96, 1.16)                                                |
| Akita      | 192   | 18.2                                | 1.04 (0.91, 1.18)                                                |
| Yamagata   | 182   | 15.8                                | 0.94 (0.82, 1.06)                                                |
| Fukushima  | 347   | 17.5                                | 1.02 (0.92, 1.13)                                                |
| Ibaraki    | 622   | 21.4                                | 1.24 (1.15, 1.34)*                                               |
| Tochigi    | 366   | 18.8                                | 1.09 (0.99, 1.20)                                                |
| Gunma      | 404   | 20.5                                | 1.19 (1.08, 1.30)*                                               |
| Saitama    | 893   | 12.6                                | 0.75 (0.70, 0.80)*                                               |
| Chiba      | 1,123 | 18.5                                | 1.09 (1.02, 1.15)*                                               |
| Tokyo      | 2,487 | 18.2                                | 1.08 (1.04, 1.12)*                                               |
| Kanagawa   | 1,456 | 16.2                                | 0.95 (0.90, 1.00)*                                               |
| Niigata    | 343   | 14.4                                | 0.87 (0.78, 0.96)*                                               |
| Toyama     | 212   | 19.6                                | 1.13 (0.99, 1.27)                                                |
| Ishikawa   | 193   | 16.6                                | 0.99 (0.86, 1.12)                                                |
| Fukui      | 134   | 17.0                                | 1.00 (0.86, 1.15)                                                |
| Yamanashi  | 148   | 17.4                                | 1.02 (0.88, 1.17)                                                |
| Nagano     | 512   | 24.0                                | 1.37 (1.26, 1.49)*                                               |
| Gifu       | 277   | 13.5                                | 0.82 (0.73, 0.91)*                                               |
| Shizuoka   | 534   | 14.5                                | 0.86 (0.79, 0.93)*                                               |
| Aichi      | 905   | 12.4                                | 0.74 (0.69, 0.79)*                                               |
| Mie        | 243   | 13.4                                | 0.81 (0.72, 0.90)*                                               |
| Shiga      | 216   | 15.6                                | 0.93 (0.82, 1.05)                                                |
| Kyoto      | 381   | 14.5                                | 0.86 (0.78, 0.95)*                                               |
| Osaka      | 1,353 | 15.5                                | 0.90 (0.86, 0.95)*                                               |
| Hyogo      | 874   | 15.8                                | 0.93 (0.87, 0.99)*                                               |
| Nara       | 321   | 23.4                                | 1.31 (1.18, 1.44)*                                               |
| Wakayama   | 171   | 17.1                                | 1.02 (0.88, 1.16)                                                |
| Tottori    | 106   | 18.2                                | 1.05 (0.89, 1.23)                                                |
| Shimane    | 158   | 22.6                                | 1.23 (1.07, 1.41)*                                               |
| Okayama    | 317   | 16.3                                | 0.97 (0.87, 1.07)                                                |
| Hiroshima  | 571   | 20.2                                | 1.18 (1.09, 1.27)*                                               |
| Yamaguchi  | 222   | 15.5                                | 0.92 (0.81, 1.04)                                                |
| Tokushima  | 94    | 12.0                                | 0.78 (0.65, 0.91)*                                               |
| Kagawa     | 167   | 17.3                                | 1.01 (0.88, 1.15)                                                |
| Ehime      | 226   | 15.7                                | 0.95 (0.84, 1.06)                                                |
| Kochi      | 129   | 16.7                                | 1.00 (0.85, 1.16)                                                |
| Fukuoka    | 1,076 | 21.2                                | 1.23 (1.16, 1.30)*                                               |
| Saga       | 142   | 16.8                                | 0.99 (0.86, 1.14)                                                |

|           |     |      |                    |
|-----------|-----|------|--------------------|
| Nagasaki  | 242 | 17.2 | 1.01 (0.89, 1.13)  |
| Kumamoto  | 339 | 18.8 | 1.09 (0.98, 1.20)  |
| Oita      | 214 | 18.2 | 1.05 (0.92, 1.18)  |
| Miyazaki  | 157 | 14.3 | 0.86 (0.74, 0.98)* |
| Kagoshima | 297 | 17.6 | 1.02 (0.92, 1.13)  |
| Okinawa   | 290 | 21.8 | 1.22 (1.09, 1.35)* |

<sup>a</sup> Direct standardization, age-sex standardized rate per 100,000 population in a prefecture.

<sup>b</sup> Indirect standardization, age- and sex-standardized rate ratio in a prefecture in comparison with that in Japan as a whole.

\* indicates statistical significance.
